# Supplementary material for: Fine-scale population epigenetic structure in relation to gastrointestinal parasite load in red grouse (Lagopus lagopus scotica)
Source: PubMed Central journal article supplement (PMC4282444; doi:10.1111/mec.12833), 2014-07-24
Supplement: mec0023-4256-SD1.pdf [file mec0023-4256-SD1.pdf]

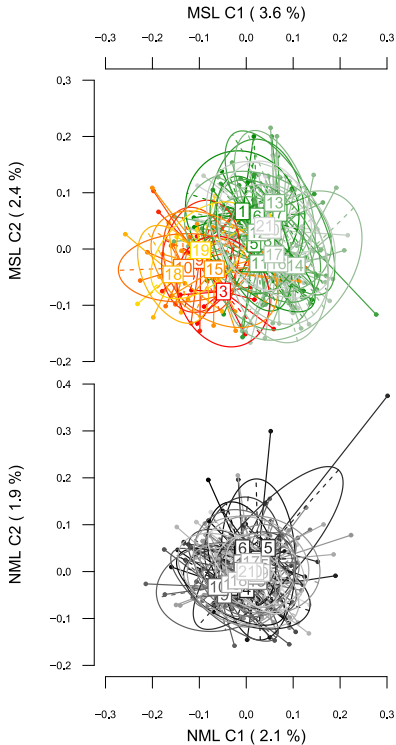

**Figure S1**

Principal coordinate analysis plots of epigenetic and genetic variation in methylation-susceptible (MSL; top) and non-methylated loci (NML; bottom). Population labels refer to sampling site ID (see main article).
